# Supplementary material for: Genome-wide profiling of Hfq-bound RNAs reveals the iron-responsive small RNA RusT in Caulobacter crescentus
Source: PubMed Central journal article supplement (PMC11005374; doi:10.1128/mbio.03153-23), 2024-03-21
Supplement: mbio.03153-23-s0003.pdf [file mbio.03153-23-s0003.pdf]

## Supporting Information for

### **Genome-wide profiling of Hfq-bound RNAs reveals the iron-responsive small RNA RusT in *Caulobacter crescentus***

Laura N. Vogt, Gaël Panis, Anna Schäpers, Nikolai Peschek, Michaela Huber, Kai Papenfort, Patrick H. Viollier, Kathrin S. Fröhlich

corresponding author: Kathrin Sophie Fröhlich

Email: [kathrin.froehlich@uni-jena.de](mailto:kathrin.froehlich@uni-jena.de)

#### **This PDF file includes:**

Figures S1 to S10  
Tables S3-S6  
Supporting Methodology  
SI References

#### **Other supporting materials for this manuscript include the following:**

Tables S1, S2

## Supplementary Figure S1

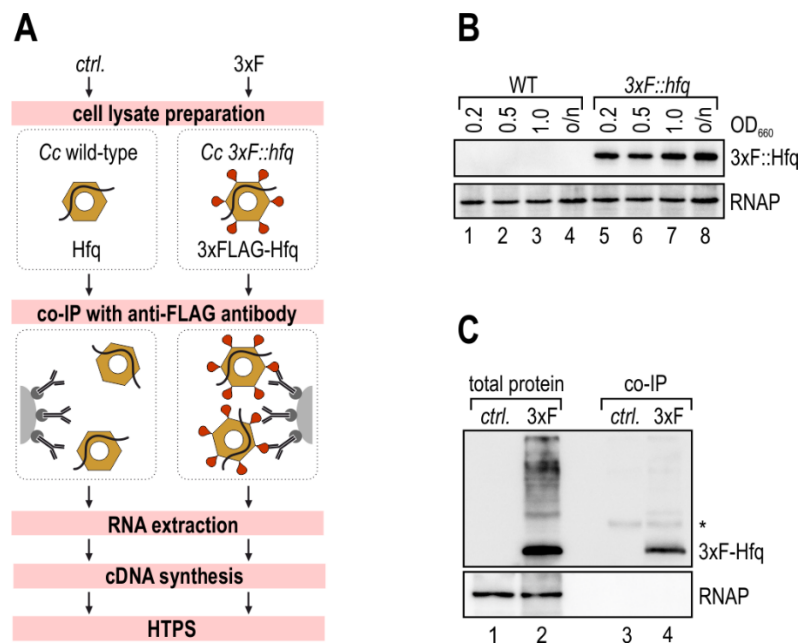

### RNA co-immunoprecipitation with Hfq in *Caulobacter crescentus*.

(A) Schematic representation of the Hfq-co-IP workflow. Cell lysates were prepared from *C. crescentus* wild-type control (WT) and a strain expressing a chromosomally-encoded 3xFLAG-Hfq protein (3xF). RNA co-immunoprecipitated with the Hfq protein was purified, converted to cDNA, and analyzed by high-throughput sequencing (HTPS). (B) Western blot analysis of total protein of WT and 3xF. Samples were collected at the indicated optical density ( $OD_{660}$ ) or after 24h of growth (o/n) in complex PYE medium. RNA polymerase (RNAP) served as loading control. (C) Western blot analysis of total protein and co-IP samples of WT and 3xF strains confirms pulldown of the tagged protein. RNAP served as loading control. The asterisk indicates a signal corresponding to the anti-FLAG antibody used for the co-IP.

## Supplementary Figure S2

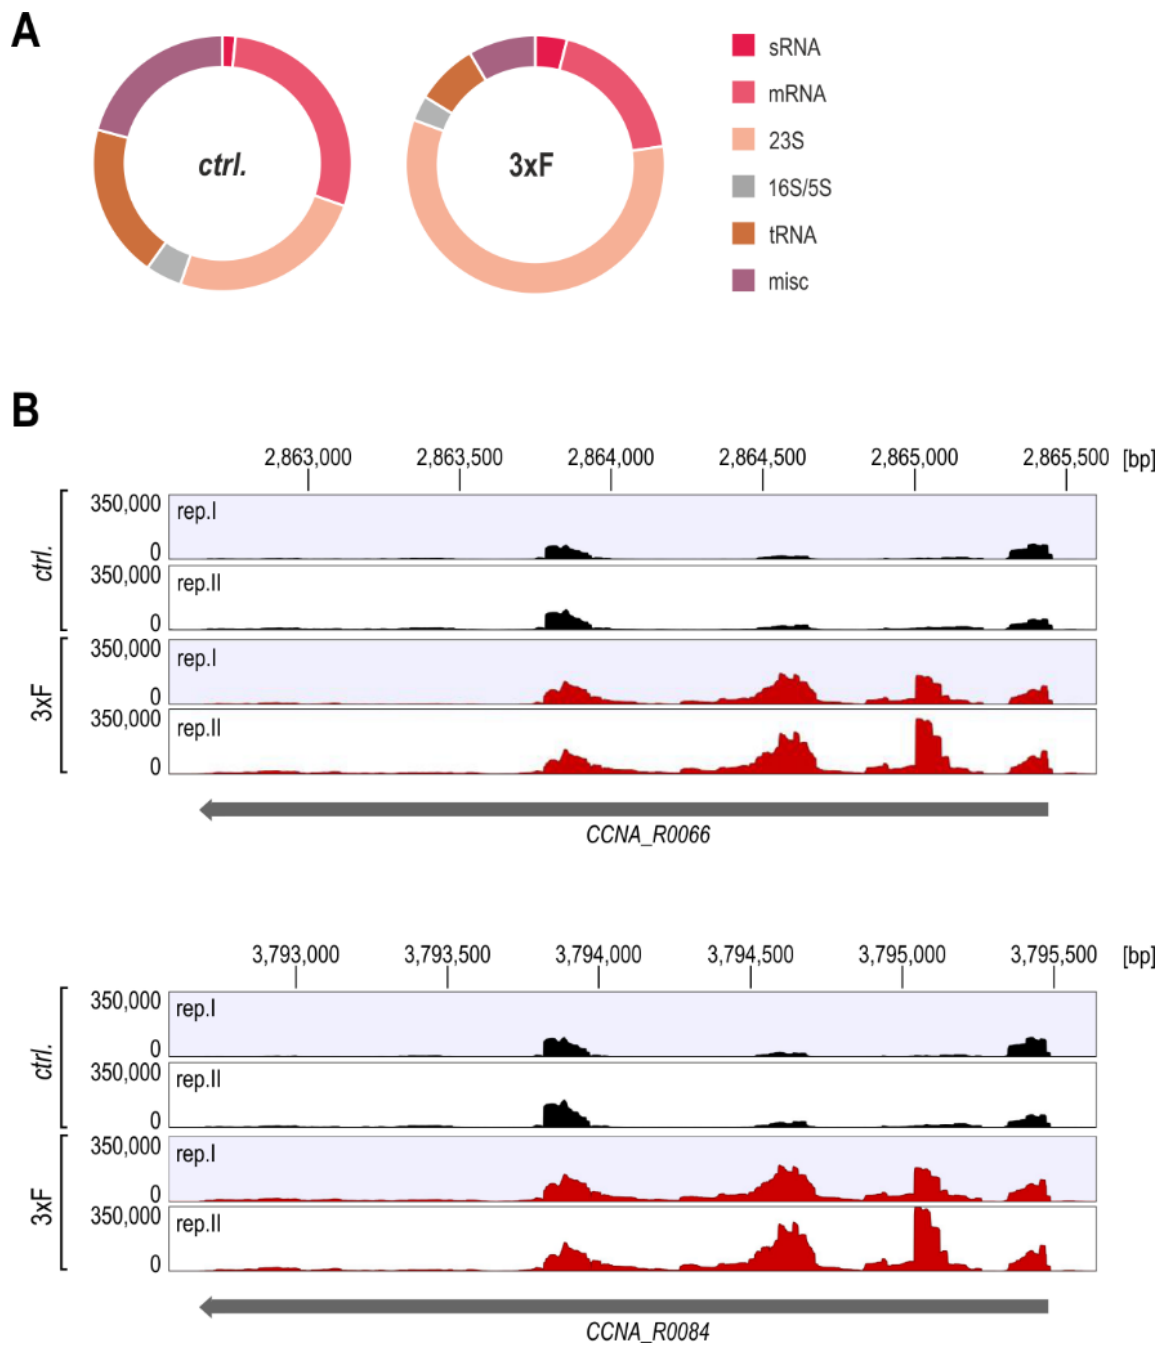

### Relative read distribution RNA co-immunoprecipitation with Hfq.

(A) Circle chart illustrating the relative distribution of cDNA reads mapped to the different RNA classes of the control (*ctrl.*) and 3xFLAG-Hfq (3xF) co-IP samples. (B) Enrichment patterns of cDNA reads of the control (*ctrl.*; black) and 3xFLAG-Hfq co-IP (3xF; red) in *C. crescentus* NA1000 mapping to the 23S rRNA genes *CCNA\_R0066* and *CCNA\_R0084*.

### Supplementary Figure S3

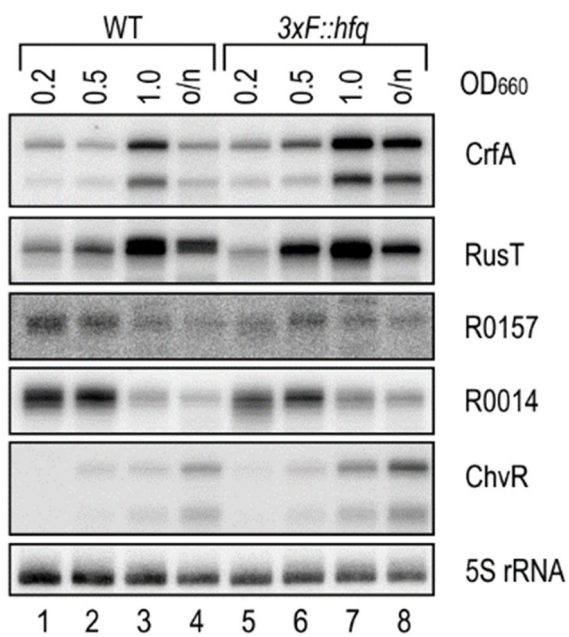

#### **sRNA expression patterns in the presence of wild-type Hfq or 3xFLAG::Hfq protein.**

Expression of selected sRNAs in *C. crescentus* wild-type and an isogenic strain expressing a chromosomally-encoded 3xFLAG::Hfq protein (*3xF::hfq*) was determined by Northern blot analysis. RNA was collected at the indicated optical density (OD<sub>660</sub>) or after 24h of growth (o/n) in PYE. 5S rRNA served as loading control.

## Supplementary Figure S4

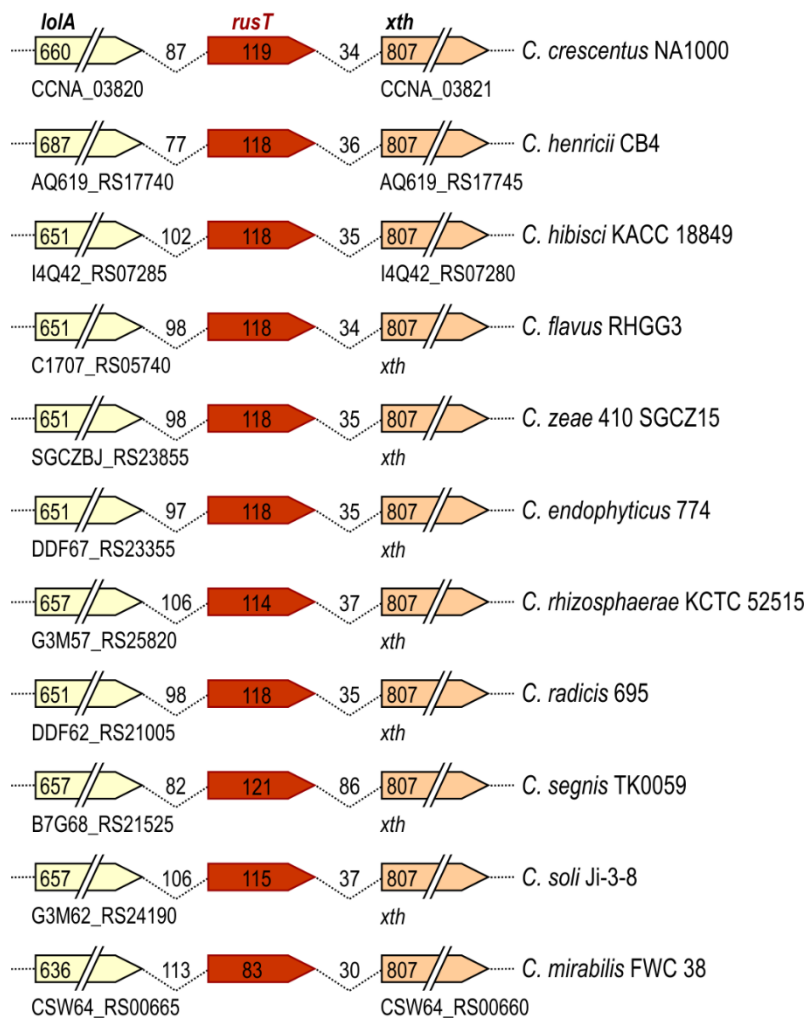

### Synteny analysis of the *rusT* gene reveals conservation of the sRNA and the genomic locus within the family of *Caulobacteraceae*.

In all cases, *rusT* is positioned in the intergenic region between homologues of *CCNA\_03820* (*lolaA*; encoding an outer membrane lipoprotein carrier protein) and *CCNA\_03821* (*xth*; encoding exodeoxyribonuclease III). Gene sizes and distances to flanking genes are indicated in bp.

## Supplementary Figure S5

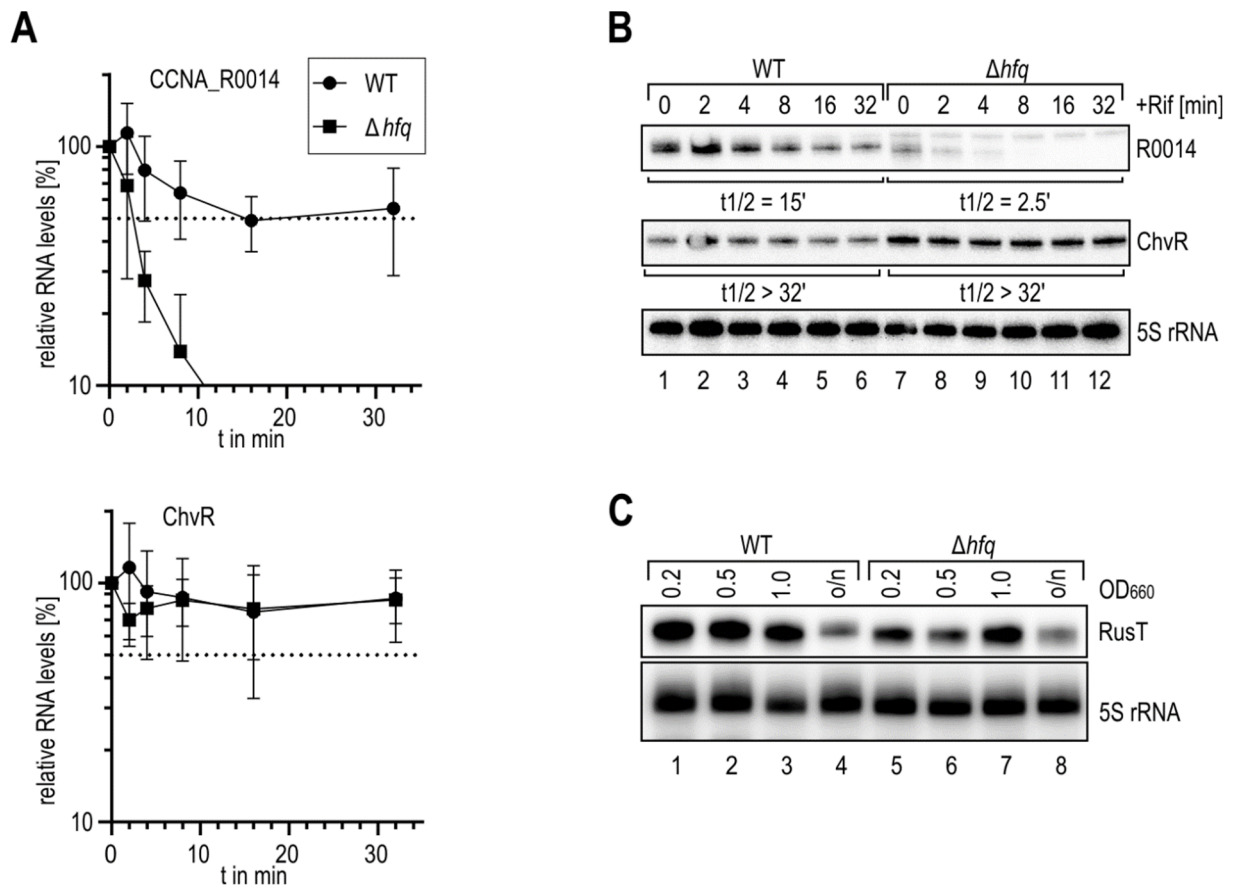

### Stability of sRNAs in wild-type or $\Delta hfq$ cells.

(A,B) Total RNA was prepared from cells grown in minimal M2G medium to exponential phase ( $OD_{660}$  of 0.5). Transcription was inhibited by the addition of rifampicin, and RNA samples were collected at indicated time-points. Relative RNA abundance was plotted in (A) based on the quantification of signal intensities determined by Northern blot analysis as in (B). Error bars indicate the standard deviation of three biological replicates. (C) Expression of RusT in *C. crescentus*  $\Delta vanAB \Delta rusT$  cells carrying the expression plasmid pP<sub>van</sub>-RusT. Cells were grown o/n in the presence of vanillate and RNA levels were determined at the indicated optical density ( $OD_{660}$ ) or after 24 h of growth (o/n). 5S rRNA served as loading control.

## Supplementary Figure S6

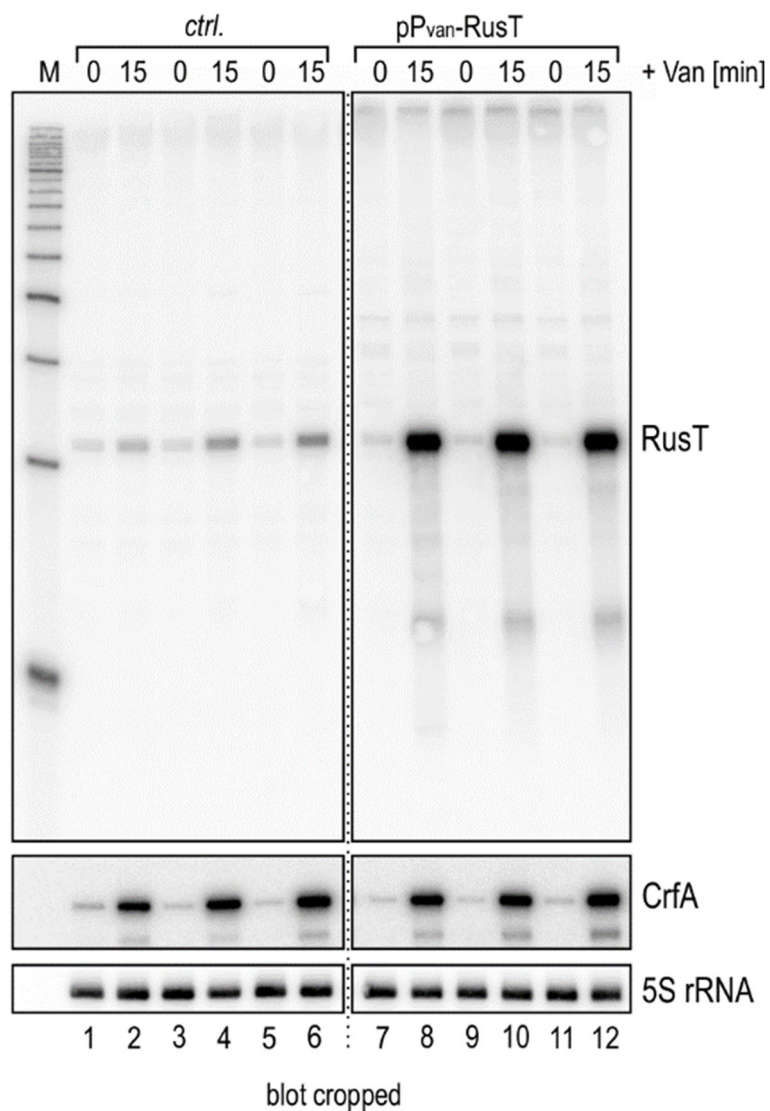

### **CrfA expression in response to addition of vanillate.**

*C. crescentus*  $\Delta vanAB$  carrying either an empty control vector (*ctrl.*; pBV-MCS6) or the expression plasmid *pP<sub>van</sub>-RusT* were grown in biological triplicates in M2G to  $OD_{660}$  of 0.8. Total RNA was prepared from cells collected prior to and 15 min after addition of vanillate. Expression of RusT and CrfA was determined by Northern blot analysis. 5S rRNA served as loading control. The dashed line indicates that the blot has been cropped to prepare this figure.

## Supplementary Figure S7

|          |                                                                                     | target fusion     | plasmid ID | regulation | method |
|----------|-------------------------------------------------------------------------------------|-------------------|------------|------------|--------|
| <b>A</b> | 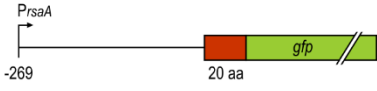   | <b>02895::gfp</b> | pKF493     | yes        | FI/WB  |
| <b>B</b> |    | <b>03263::gfp</b> | pKF494     | yes        | WB     |
| <b>C</b> |    | <b>01043::gfp</b> | pKF495     | yes        | WB     |
| <b>D</b> |    | <b>02400::gfp</b> | pKF496     | yes        | WB     |
| <b>E</b> |    | <b>ompW::gfp</b>  | pKF497     | yes        | FI     |
| <b>F</b> |  | <b>01738::gfp</b> | pKF498     | nd         | FI/WB  |
| <b>G</b> |  | <b>00210::gfp</b> | pKF501     | yes        | FI/WB  |
| <b>H</b> |  | <b>02380::gfp</b> | pKF499     | yes        | WB     |
| <b>I</b> |  | <b>03181::gfp</b> | pKF500     | yes        | FI     |
| <b>J</b> |  | <b>01043::gfp</b> | pKF502     | no         | FI     |
| <b>K</b> |  | <b>03248::gfp</b> | pKF503     | yes        | WB     |



|   |                                                                                     | target fusion      | plasmid ID | regulation | method |
|---|-------------------------------------------------------------------------------------|--------------------|------------|------------|--------|
| L | 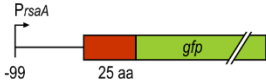   | <i>02741::gfp</i>  | pKF544     | yes        | WB     |
| M |    | <i>03774::gfp</i>  | pKF545     | yes        | FI     |
| N |    | <i>00338::gfp</i>  | pKF546     | nd         | FI/WB  |
| O |    | <i>glnBA::gfp</i>  | pKF547     | yes        | FI     |
| P |    | <i>glnB::gfp</i>   | pKF548     | no         | FI     |
| Q |    | <i>02342::gfp</i>  | pKF549     | yes        | FI     |
| R |  | <i>03294::gfp</i>  | pKF504     | yes        | FI     |
| S |  | <i>02380::gfp</i>  | pKF550     | no         | FI     |
| T |  | <i>03360::gfp</i>  | pKF551     | yes        | FI     |
| U |  | <i>hfq_P1::gfp</i> | pKF506     | yes        | FI     |
| V |  | <i>hfq_P2::gfp</i> | pKF505     | no         | FI     |

### Design of RusT target candidate reporter fusions.

Schematic representation of the translational reporter fusions of RusT target candidates. For each target, the 5' untranslated region plus the first 20-25 codons (marked in red) are fused to *gfp* (marked in green) and expressed under control of the constitutive  $P_{rsaA}$  promoter. The position of the TSS relative to the start codon is indicated in nts. Regulation by RusT was evaluated by determination of GFP production of the reporter by fluorescence intensity (FI) measurements or Western blot analysis (WB).

## Supplementary Figure S8

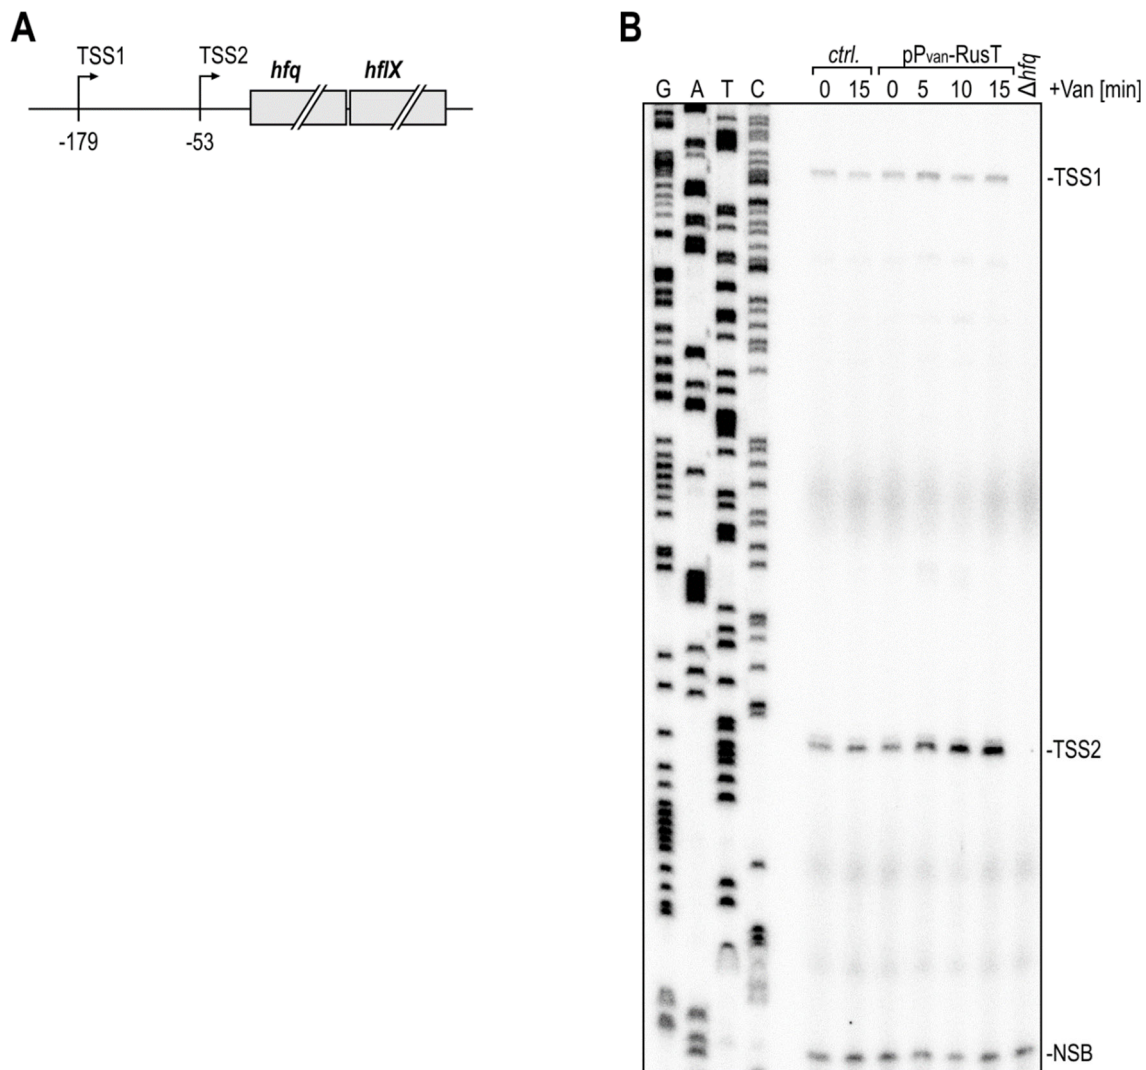

### Effect of RusT overexpression on *hfq* mRNA isoforms.

(A) Schematic representation of the *hfq-hflX* locus in *C. crescentus*. (B) *C. crescentus*  $\Delta$ *vanAB* carrying either an empty control vector (pBV-MCS6; *ctrl.*) or the expression plasmid pP<sub>van</sub>-RusT were grown in M2G to an OD<sub>660</sub> of 0.8. Total RNA was prepared from cells collected prior to and at indicated time-points after addition of vanillate (compare Fig. 5A). Size and abundance of the different isoforms of the *hfq-hflX* mRNAs transcribed from TSS 1 and TSS 2 were resolved by primer extension analysis. RNA collected from an *hfq* deletion strain was included to verify specificity of the oligo (NSB: non-specific band).

## Supplementary Figure S9

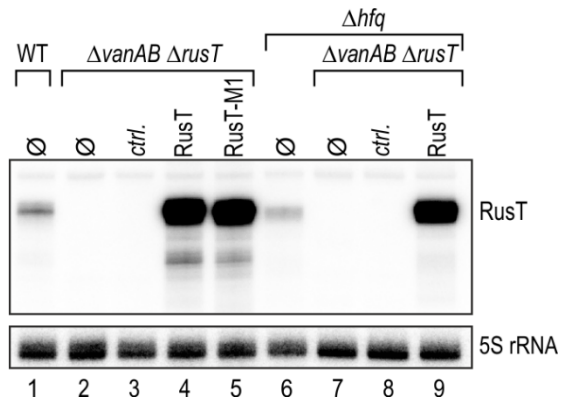

### Expression of RusT variants.

Expression of RusT in *C. crescentus* wild-type,  $\Delta vanAB \Delta rusT$ ,  $\Delta hfq$  and  $\Delta hfq \Delta vanAB \Delta rusT$  cells carrying either no plasmid ( $\emptyset$ ), empty control plasmid pBV-MCS6 (*ctrl.*), pP<sub>van</sub>-RusT or pP<sub>van</sub>-RusT-M1. RNA was extracted from cells grown in PYE in the presence of vanillate to OD<sub>660</sub> of ~1.0 and subjected to Northern blot analysis. 5S rRNA served as loading control.

## Supplementary Figure S10

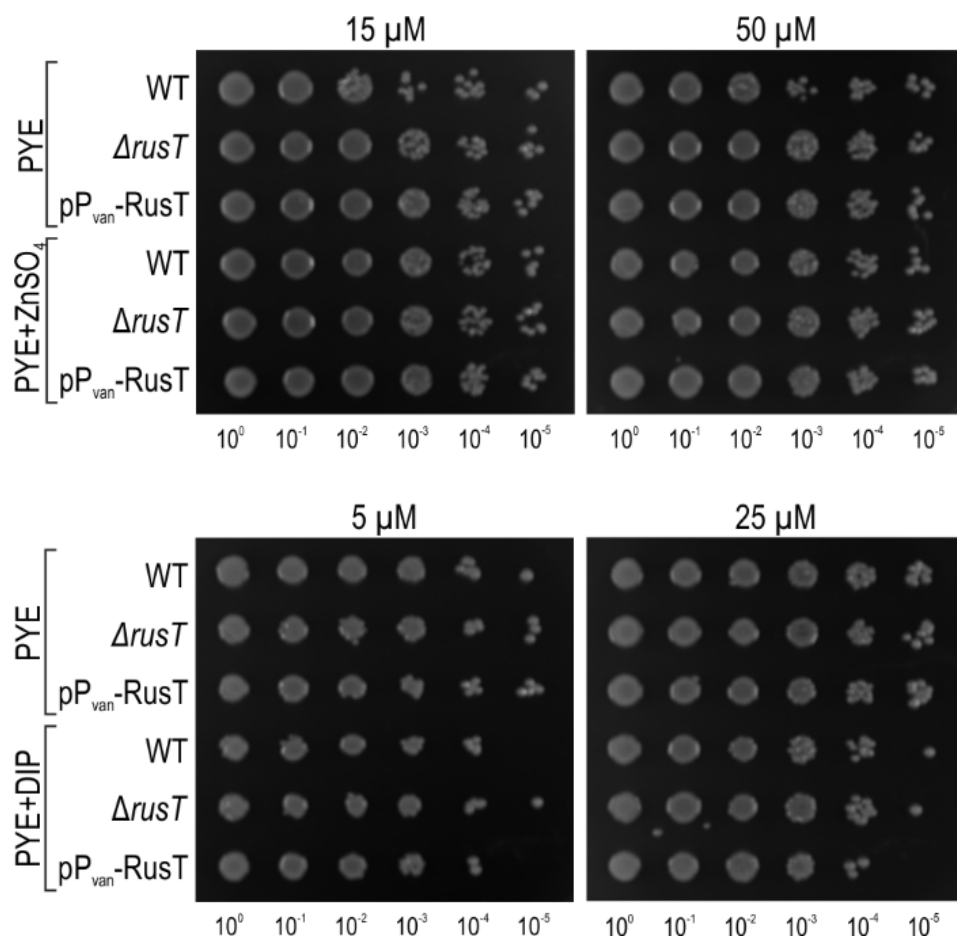

### Fitness of *rusT* mutants.

Efficiency of plating of *C. crescentus* wild-type,  $\Delta rusT$  or RusT overexpressing (pP<sub>van</sub>-RusT in  $\Delta vanAB$ ) cells on PYE plates after 7 h of growth in PYE or PYE supplemented with the indicated concentration of ZnSO<sub>4</sub> or DIP, respectively. For RusT overexpression, cultures of  $\Delta vanAB$  cells carrying pP<sub>van</sub>-RusT were additionally supplemented with 0.5 mM vanillate. Spots are 10-fold serial dilutions starting from OD<sub>660</sub> of 0.2.

## SUPPORTING METHODOLOGY

### Plasmid construction

Plasmids for allelic replacements were constructed by fusing flanking fragments of genes *rusT* (f1: KFO-0741/KFO-0742, f2: KFO-0743/KFO-0744; pKF511-8) or *CCNA\_00210* (f1: KFO-2481/KFO-2482, f2: KFO-2483/2484; pKF889-5) with linearized plasmid pNPTS138 (KFO-0059/KFO-0060) at the multiple cloning site using Gibson assembly according to the manufacturer's recommendation (NEB, #E2611).

The transcriptional reporter plasmid pKF507-1 was constructed by inserting the *rusT* promoter region (spanning -87 to +8 of the *rusT* gene relative to the TSS; amplification by KFO-0699/KFO-0700; ClaI/NheI restricted) into the equally restricted pKF383-7 backbone ((1); amplified by PCR via KFO-0697/KFO-0698). To obtain the transcriptional reporter plasmid pKF776-1, a *nptII* fragment (amplified from pRL27 (2) by PCR via KFO-1785/KFO-1786; NdeI/SalI restricted) was inserted into pKF507-1 (XhoI/NdeI restricted), replacing the *lacZ* gene.

Plasmid pVan-RusT (pKF482-1) was constructed by ligation of the *rusT* fragment (PCR-amplified from *C. crescentus* gDNA using KFO-0684/KFO-0631; XbaI restricted) to the pBVMCS-6 backbone ((3); PCR-amplified with KFO-0056/KFO-0144 at the +1 site of the vanillate-inducible promoter; XbaI restriction).

To construct post-transcriptional *gfp* reporter fusions under the control of the constitutive *rsaA* promoter, the 5' UTR and first 20-25 codons of each target gene (inserts amplified from gDNA; see Table 2 and Figure S7 for details) were cloned into KpnI and EcoRI or MfeI (for pKF494-2) restriction sites of pKF385-2 as in (1).

Single nucleotide mutations were introduced by PCR amplification of the original plasmids, DpnI digestion of template DNA, and self-ligation of purified PCR products. Plasmid pKF482-1 served as a template for PCR amplification with primer pairs KFO-0750/KFO-0751 (pVan-RusT-M1; pKF512-2) and KFO-1575/KFO-1576 (pVan-RusT-SL3mut; pKF732-3). Correspondingly, reporter fusion plasmids served as templates for PCR amplification with primer pairs as follows: plasmid pKF493-2 with KFO-1641/KFO-1642 (pPrsaA-*CCNA\_02895-M1::gfp*; pKF740-1), pKF497-2 with KFO-0983/KFO-0984 (pPrsaA-*ompW-M1::gfp*; pKF563-1), pKF501-1 with KFO-0989/KFO-0990 (pPrsaA-*CCNA\_00210-M1::gfp*; pKF566-1).

### Construction of bacterial strains and growth conditions

Genomic deletions and insertions in *C. crescentus* were obtained using a two-step recombination procedure (4). Chromosomal mutations were transferred by phage Cr30 transduction following standard protocols (5).

*C. crescentus* was cultivated aerobically at 30°C in either complex PYE medium, or in minimal M2 salts containing 0.2% glucose, 0.3% maltose or 0.2% xylose as carbon source (82). Where appropriate, media were supplemented with antibiotics at the following concentrations (liquid/solid): kanamycin (5/25 µg/mL); chloramphenicol (2/1 µg/mL); oxytetracycline (2/1 µg/mL); gentamycin (1/1 µg/mL). Expression from the *vanAB* promoter was induced by addition of a final concentration of 0.5 mM vanillate to cultures.

To test expression of RusT under different conditions, *C. crescentus* wild-type was cultivated in PYE to OD<sub>660</sub> of 0.4. The culture was split and either resuspended in PYE at a pH of 5.5 or pH 8.5, respectively, subjected to a temperature shift (20 °C, 37 °C or 42 °C), or to chemical stress by addition of 85 mM NaCl, 40 mM KCl, 150 mM sucrose, 0.2% xylose, 0.2% glucose, 200 µM 2,2'-dipyridyl (DIP), 75 µM ZnSO<sub>4</sub>, 30 µM CuSO<sub>4</sub>, 10 mM H<sub>2</sub>O<sub>2</sub> or 10 mM paraquat, respectively.

To analyse RNA stability, cells grown in M2G were treated with rifampicin (200 µg/mL) at an OD<sub>660</sub> of 0.5 to terminate transcription. RNA samples were collected at the indicated time points and transcript levels were determined by Northern Blot analysis.

*Escherichia coli* strains were grown aerobically at 37 °C in LB broth and supplemented with kanamycin (50 µg/mL), chloramphenicol (20 µg/mL) or tetracyclin (12 µg/ml) where appropriate. For conjugation, *E. coli* WM3064 was grown in LB with antibiotics at 30 °C under agitation in media supplemented with 0.3 mM meso-diaminopimelic acid (mDAP) to enable growth for WM3064 derivatives (6).

### **Hfq co-IP**

Duplicates of *C. crescentus* wild-type and cells expressing 3XFLAG-Hfq (KFS-0344) were grown in PYE medium to OD<sub>660</sub> of 1. Expression of the tagged protein under the tested condition was confirmed by immunoblot analysis (Fig. S1B). Cell pellets corresponding to 50 OD<sub>660</sub> were collected and subjected to immunoprecipitation as described previously (7). cDNA libraries were prepared using the NEBNext Small RNA Library Prep Set for Illumina (NEB; E7300) according to the manufacturer's instructions. cDNA libraries were pooled and sequenced using an Illumina MiSeq system in paired end mode. Demultiplexed raw reads were imported into the CLC Genomics Workbench (Qiagen) and subjected to quality control and adaptor trimming. The trimmed reads were mapped to the *Caulobacter crescentus* NA1000 reference genome (NC\_011916) with standard parameter settings. The dataset has been deposited at the National Center for Biotechnology Information's Gene Expression Omnibus (GEO) repository (8), and is available via the GEO accession GSE148206.

### **Transcriptome analysis using RNA-seq**

*C. crescentus* ( $\Delta$ *vanAB*) cells carrying either the control vector pBV-MCS6 or a plasmid to express RusT under control of the vanillate-inducible promoter (pVan-RusT; pKF482-1) were grown in triplicates in M2 medium supplemented with glucose. RNA samples were collected prior to and 15 min after addition of vanillate to the culture at OD<sub>660</sub> of 0.8. Total RNA was purified, digested with DNase I, and RNA integrity was confirmed using a Bioanalyzer (Agilent). cDNA libraries were prepared using the NEBNext Ultra II Directional RNA Library Prep Kit for Illumina (NEB, #E7760) and sequenced using a HiSeq 1500 System in single-read mode. The read files in FASTQ format were imported into CLC Genomics Workbench (Qiagen), trimmed and mapped to the *Caulobacter crescentus* NA1000 reference genome (NC\_011916) using the "RNA-Seq Analysis" tool with standard parameters. Read counts were normalized (CPM) and transformed ( $\log_2$ ). Differential expression was tested using the built in tool corresponding to edgeR in exact mode with tagwise dispersions. Genes with a fold change  $\geq 2.0$  and a FDR-adjusted *p*-value  $\leq 0.05$  were considered as differentially expressed. The dataset has been deposited at the GEO repository, and is available via the GEO accession GSE148208.

### **Chromatin Immunoprecipitation coupled to deep sequencing (ChIP-seq)**

Culture of exponentially growing *C. crescentus* CB15 *ntrX::ntrX-HA* (OD<sub>660</sub> of 0.5, 80 ml of culture in PYE) was supplemented with 10 µM sodium phosphate buffer (pH 7.6) and then treated with formaldehyde (1% final concentration) at RT for 10 min to achieve crosslinking. Subsequently, the culture was incubated for an additional 30 min on ice and washed three times in phosphate buffered saline (PBS, pH 7.4). The resulting cell pellet was stored at -80 °C. After resuspension of the cells in TES buffer (10 mM Tris-HCl pH 7.5, 1 mM EDTA, 100 mM NaCl) containing 10 mM of DTT, the cell resuspension was incubated in the presence of Ready-Lyse lysozyme solution (Lucigen, #186002) for 10 min at 37 °C, according to the manufacturer's instructions. The lysate was sonicated (Bioruptor Pico) at 4 °C using 15 bursts of 30 sec to shear DNA fragments to an average length of 0.3–0.5 kbp and cleared by

centrifugation at 14,000 rpm for 2 min at 4 °C. The volume of the lysate was then adjusted to 1 ml using ChIP buffer (0.01% SDS, 1.1% Triton X-84 100, 1.2 mM EDTA, 16.7 mM Tris-HCl [pH 8.1], 167 mM NaCl) containing protease inhibitors (Roche) and pre-cleared with 80 µl of Protein-A agarose (Roche) and 100 µg BSA. Five percent of the pre-cleared lysate was kept as total input sample (negative ChIP control sample). The rest of the pre-cleared lysate was then incubated overnight at 4°C with a monoclonal rabbit Anti-HA Tag antibody (Millipore, clone 114-2C-7; 1:400). The immuno-complexes were captured by incubation with Protein-A agarose beads (pre-saturated with BSA) during a 2 h incubation at 4°C and then, washed subsequently with low salt washing buffer (0.1% SDS, 1% Triton X-100, 2 mM EDTA, 20 mM Tris-HCl pH 8.1, 150 mM NaCl), with high salt washing buffer (0.1% SDS, 1% Triton X-100, 2 mM EDTA, 20 mM Tris-HCl pH 8.1, 500 mM NaCl), with LiCl washing buffer (0.25 M LiCl, 1% NP-40, 1% deoxycholate, 1 mM EDTA, 10 mM Tris-HCl pH 8.1) and finally twice with TE buffer (10 mM Tris-HCl pH 8.1, 1 mM EDTA). The immuno-complexes were eluted from the Protein-A beads with two times 250 µL elution buffer (SDS 1%, 0.1 M NaHCO<sub>3</sub>, freshly prepared) and then, just like the total input sample, incubated overnight with 300 mM NaCl at 65°C to reverse the crosslinks. The samples were then treated with 2 µg of Proteinase K for 2 h at 45°C in 40 mM EDTA and 40 mM Tris-HCl (pH 6.5). DNA was extracted using phenol:chloroform:isoamyl alcohol (25:24:1), ethanol-precipitated using 20 µg of glycogen as a carrier and resuspended in 30 µl of DNase/RNase free water.

Immunoprecipitated chromatin was used to prepare sample libraries used for deep-sequencing at Fasteris SA (Geneva, Switzerland). ChIP-Seq libraries were prepared using the DNA Sample Prep Kit (Illumina) following the manufacturers' instructions. A single-end run was performed on an Illumina Next-Generation DNA sequencing instrument (NextSeq High), 50 cycles were performed and yielded several million reads per sequenced samples. The single-end sequence reads stored in FastQ files were mapped against the genome of *C. crescentus* NA1000 (NC\_011916.1) using Bowtie2 Version 2.4.5+galaxy1 available on the web-based analysis platform Galaxy (<https://usegalaxy.org>) to generate the standard genomic position format files (BAM). ChIP-Seq reads sequencing and alignment statistics are summarized in Supplementary Table S2. Then, BAM files were imported into SeqMonk version 1.47.2 (<http://www.bioinformatics.babraham.ac.uk/projects/seqmonk/>) to build ChIP-Seq normalized sequence read profiles. Briefly, the genome was subdivided into 50 bp, and for every probe, we calculated the number of reads per probe as a function of the total number of reads (per million, using the Read Count Quantitation option). Analysed data illustrated in Figure 4 are provided in Supplementary Table S2. Using the web-based analysis platform Galaxy (<https://usegalaxy.org>), NtrX-HA ChIP-Seq peaks were called using MACS2 Version 2.2.7.1+galaxy0 (No broad regions option) relative to the total input DNA samples. The q-value (false discovery rate, FDR) cut-off for called peaks was 0.05. Peaks were rank-ordered according to their fold-enrichment values (Supplementary Table S2, peaks with a fold-enrichment values >2 were retained for further analysis). Sequence data have been deposited to the Gene Expression Omnibus (GEO) database (GSE247928 series, accession numbers GSM7903192 and GSM7903193).

### **T7 transcription and 5' end labelling of RNA**

RNAs were synthesized by *in vitro* transcription and 5' end-labelled as described previously (9, 10). In short, a DNA template carrying the T7 promoter was amplified by PCR (KFO-0892/KFO-0893 on gDNA for RusT; KFO-0892/KFO-0893 on pKF512-2 for RusT-M1; KFO-0351/0352 on gDNA for ChvR; KFO-0513/0514 on gDNA for R0014; KFO-0563/0564 on gDNA for R0157; KFO-0937/938 on gDNA for CrfA) and transcribed using the AmpliScribe T7-Flash transcription kit (Epicentre). Purified RNA (20 pmol) was dephosphorylated using calf intestinal alkaline phosphatase (NEB), and recovered by P:C:I extraction and ethanol precipitation. 5' end-

labelling was achieved by incubation of dephosphorylated RNA with [<sup>32</sup>P]-γATP (25 μCi) and polynucleotide kinase (1 unit; NEB) for 1 h at 37°C. RNA was then purified on a denaturing 6% PAA / 7 M urea gel, eluted in RNA elution buffer (0.1 M sodium acetate, 0.1% SDS, 10 mM EDTA) at 4°C overnight and recovered by P:C:I extraction.

### **Primer extension analysis**

For primer extension, 5 μg of RNA were denatured in the presence of 1 pmol 5' end-labelled primer (KFO-0966) at 70°C for 2 min and adjacently chilled on ice for 5 min. Next, the samples were mixed with the reaction mix (1X first strand buffer, 5 mM DTT, 0.5 mM each dATP, dGTP, dCTP and dTTP) at 42°C, and SuperScript III (100 U; Invitrogen) was added. cDNA synthesis was performed at 50°C for 60 min, followed by incubation at 70°C for 15 min to inactivate the enzyme. Samples were treated with RNase H (2.5 U) for 15 min at 37°C and the reaction was stopped by the addition of GLII loading buffer. Samples were separated electrophoretically together with a template-specific ladder (prepared using the SequiTherm EXCELII DNA Sequencing Kit) on a 6% sequencing gel.

### **Electrophoretic Mobility Shift Assays**

Complex formation between sRNAs and Hfq was analysed *in vitro* using gel mobility shift assays following previously established protocols (11). In short, denatured 5' end labelled sRNA (4 nM final concentration) was incubated with purified *C. crescentus* Hfq (lab stock; concentration as indicated in the figure legend) in the presence of 1 μg yeast RNA and 1x structure buffer (0.01 M Tris-HCl [pH 7], 0.1 M KCl, 0.01 M MgCl<sub>2</sub>) or Hfq dilution buffer (1x structure buffer, 1% glycerol, 0.1% Triton X-100) at 30°C for 15 min. Reactions were mixed with native loading buffer (50% glycerol, 0.5x TBE, 0.2% bromophenol blue) and separated by native PAGE. Gels were dried and signals visualized on a phosphor imager.

### **RNA structure probing**

RNA structure probing and mapping of Hfq footprints was conducted as described previously (12) with some alterations. Briefly, 0.4 pmol 5' end-labelled RNA was denatured, cooled on ice and mixed with *C. crescentus* Hfq (0.4 pmol or 2 pmol) or Hfq dilution buffer in the presence of 1X structure buffer (0.01 M Tris pH 7, 0.1 M KCl, 0.01 M MgCl<sub>2</sub>) and 1 μg yeast RNA (Invitrogen, #AM7118). Upon incubation at 30°C for 10-15 min, the samples were treated with RNase T1 (0.1U; Ambion, #AM2283) for 2.5 min, with lead(II) acetate (final concentration: 5mM; Sigma-Aldrich, # 316512-5G) for 1.5 min or with RNase V1 (2x10<sup>-5</sup> U; Ambion, #AM2275) for 1 min, respectively. Reactions were stopped by addition of 2 vol. equiv. precipitation buffer (1 M guanidinium thiocyanate, 0.167% N-laurylsarcosine, 10 mM DTT, 83% 2-propanol) and precipitated at -20°C overnight. Pellets were washed with 70% ethanol, and dissolved in GLII loading buffer. The RNase T1 and alkaline (OH) sequencing ladders were prepared with 0.8 pmol 5' end-labelled sRNA and stopped by addition of 1 vol. equiv. of GLII. Samples were separated by denaturing PAGE on 10% PAA / 7 M urea sequencing gels.

### **Bioinformatic tools**

Sequence alignments were generated using MultAlin ((13); <http://multalin.toulouse.inra.fr/>). RNAfold (<http://rna.tbi.univie.ac.at/cgi-bin/RNAWebSuite/RNAfold.cgi>) was employed to predict RNA secondary structures. Predictions for RNA base-pairing interactions were determined with the RNAhybrid ((14); <https://bibiserv.cebitec.uni-bielefeld.de/rnahybrid/>) and IntaRNA ((15); <http://rna.informatik.uni-freiburg.de/IntaRNA/>) algorithms.







**Supplementary Table S4 – Oligonucleotides**

| <b>oligo ID</b> | <b>sequence 5' to 3'</b>                           | <b>description</b>                                                          |
|-----------------|----------------------------------------------------|-----------------------------------------------------------------------------|
| KFO-0056        | AAGCTTGATATCGAATTCCTGCA                            | amplification of pBVMCS-6                                                   |
| KFO-0059        | CGAATTCGTGGATCCAGATATC                             | amplification of pNPTs138                                                   |
| KFO-0060        | CTTCGGCCGTGACGCGTCT                                | amplification of pNPTs138                                                   |
| KFO-0113        | CAGGGGGACTTAACGACCGAGTTC                           | oligo probe for 5S ribosomal RNA                                            |
| KFO-0144        | GGATCCAATCTTGATCGTAAT                              | amplification of pBVMCS-6                                                   |
| KFO-0221        | ATGGCCCTCCGGAGACTTG                                | oligo probe for ChvR                                                        |
| KFO-0351        | GTTTTTTTTTAATACGACTCACTATAGGCGGG<br>GCCTACATGTGC   | amplification of ChvR DNA template for T7 <i>in vitro</i><br>transcription  |
| KFO-0352        | GTTTTTTTTTAATACGACTCACTATAGGCATGT<br>CGCGCAAGTCTCC | amplification of ChvR DNA template for T7 <i>in vitro</i><br>transcription  |
| KFO-0359        | ACCCGCCAGGTGAACAGTC                                | sequencing of plasmids with backbone pGFPC-2                                |
| KFO-0513        | GTTTTTTTTTAATACGACTCACTATAGGTGAG<br>GCGGCGTGCC     | amplification of R0014 DNA template for T7 <i>in vitro</i><br>transcription |
| KFO-0514        | AAAAAAAAGCCCGGCGAAACCG                             | amplification of R0014 DNA template for T7 <i>in vitro</i><br>transcription |
| KFO-0554        | GTCTAGTCTCTCATGCCGC                                | oligo probe for CCNA_R0199 RNA                                              |
| KFO-0563        | GTTTTTTTTTAATACGACTCACTATAGGTGAG<br>GCGCCGAGCGC    | amplification of R0157 DNA template for T7 <i>in vitro</i><br>transcription |
| KFO-0564        | AAAAAGAAAGCCCGGCCATG                               | amplification of R0157 DNA template for T7 <i>in vitro</i><br>transcription |
| KFO-0577        | GGGCTACAAAGTCATAGGGAG                              | oligo probe for CCNA_R0157 RNA                                              |
| KFO-0579        | GGGCCAGTTCATTAGGGAGG                               | oligo probe for CCNA_R0014 RNA                                              |
| KFO-0580        | GACCATGATTAGGCGAAGCTACGT                           | sequencing of plasmids with backbone pNTPS138                               |
| KFO-0581        | TGTGCTGCAAGGCGATTAAGTTGG                           | sequencing of plasmids with backbone pNTPS138                               |
| KFO-0630        | GCATGGCGATGGGCGACC                                 | construction of plasmid pKF482-1                                            |
| KFO-0631        | GTTTTTCTAGAGCCCCGCTCTATCGCGCT                      | construction of plasmid pKF482-1                                            |
| KFO-0697        | ACGCTCATCGATAATTTTAC                               | construction of plasmid pKF507-1                                            |
| KFO-0698        | GCATGGCGGGTACCCACGATGCGAGGAAACG                    | construction of plasmid pKF507-1                                            |
| KFO-0699        | CGTGGGTACCCGCCATGCGTGTTAAATATG                     | construction of plasmid pKF507-1                                            |
| KFO-0700        | GTTTTGCTAGCGTCGGCGGATTTGTGACA                      | construction of plasmid pKF507-1                                            |
| KFO-0713        | CTTTTGAATTCACCGGACGTTTCAAGTCCG                     | construction of plasmid pKF493-2                                            |
| KFO-0714        | CTTTTGGTACCCAGTCGCGTCGTGAAGGAA                     | construction of plasmid pKF493-2                                            |
| KFO-0715        | CTTTTCAATTGATGCTGCGAGGGGCTCGC                      | construction of plasmid pKF494-2                                            |
| KFO-0716        | CTTTTGGTACCGATCGCGACCGCCGAAGC                      | construction of plasmid pKF494-2                                            |
| KFO-0717        | CTTTTGAATTCTGCAACGCGCGGGATGCAA                     | construction of plasmid pKF495-1                                            |
| KFO-0718        | CTTTTGGTACCGCGGGCGAAGCGATGG                        | construction of plasmid pKF495-1                                            |
| KFO-0719        | CTTTTGAATTCGAACGCGACGATAGATCGC                     | construction of plasmid pKF496-2                                            |
| KFO-0720        | CTTTTGGTACCCGCGGCGATGAAATTCGC                      | construction of plasmid pKF496-2                                            |
| KFO-0721        | CTTTTGAATTCGCGACAAGAAACAAGACGTC                    | construction of plasmid pKF497-2                                            |
| KFO-0722        | CTTTTGGTACCCGTAAAGTCTTGAGCCTGG                     | construction of plasmid pKF497-2                                            |
| KFO-0723        | CTTTTGAATTCGACCCATGTTCTCGATGCG                     | construction of plasmid pKF498-1                                            |
| KFO-0724        | CTTTTGGTACCGGCCATGGTCGCGACGCT                      | construction of plasmid pKF498-1                                            |
| KFO-0725        | CTTTTGAATTCACCTGTTTTGGGGCCTTGTG                    | construction of plasmid pKF499-1                                            |
| KFO-0726        | CTTTTGGTACCGAGGTCGGCCTGGGTCAC                      | construction of plasmid pKF499-1                                            |
| KFO-0727        | CTTTTGAATTCGTTCCGGGCGATTTTTTGGC                    | construction of plasmid pKF500-2                                            |
| KFO-0728        | CTTTTGGTACCGATCTCACCGATCTCGTACAG                   | construction of plasmid pKF500-2                                            |
| KFO-0729        | CTTTTGAATTCAAAGGCACGAAACTATGCGA                    | construction of plasmid pKF501-1                                            |

|          |                                                      |                                                                         |
|----------|------------------------------------------------------|-------------------------------------------------------------------------|
| KFO-0730 | CTTTTGGTACCGGATGCCGAAAGGGCGC                         | construction of plasmid pKF501-1                                        |
| KFO-0731 | CTTTTGAATTCTGCAACGCGCGGGATGCA                        | construction of plasmid pKF502-2                                        |
| KFO-0732 | CTTTTGGTACCGAGCGCACCGTTCAAACG                        | construction of plasmid pKF502-2                                        |
| KFO-0733 | CTTTTGAATTCAACAAACACCCAAAAGTATA                      | construction of plasmid pKF503-2                                        |
| KFO-0734 | CTTTTGGTACCATTTCGCGGACGAAAACAT                       | construction of plasmid pKF503-2                                        |
| KFO-0735 | CTTTTGAATTTCGCGCAGGGTTGGGTAAAG                       | construction of plasmid pKF504-1                                        |
| KFO-0736 | CTTTTGGTACCGAAGCTATCGATGCGCTTC                       | construction of plasmid pKF504-1                                        |
| KFO-0737 | CTTTTGAATTTCGGCGCGCCAGAAAGCCGT                       | construction of plasmid pKF505-1                                        |
| KFO-0738 | CTTTTGGTACCGACTTGCGAACGCTGTTCA                       | construction of plasmid pKF505-1 and 506-1                              |
| KFO-0739 | CTTTTGAATTTCGTTTGTGTGGGGGGCGTG                       | construction of plasmid pKF506-1                                        |
| KFO-0741 | GATATCTGGATCCACGAATTCGGCAAGGCGCG<br>GTTTCGCT         | construction of plasmid pKF511-8                                        |
| KFO-0742 | GCGCTTTTTGGGACCGGAAGTGTTAAATATG<br>CCACGTCCT         | construction of plasmid pKF511-8                                        |
| KFO-0743 | AGGACGTGGCATATTTAACACTTCCGGTCCCC<br>AAAAAGCGC        | construction of plasmid pKF511-8                                        |
| KFO-0744 | AGACGCGTCACGGCCGAAGCCGGCGCGATAT<br>TGAGGTC           | construction of plasmid pKF511-8                                        |
| KFO-0788 | CCTATCGCCTCCCGGCGGCGGCAT                             | construction of plasmid pKF518-2                                        |
| KFO-0789 | GGGAGGCGATAGGTTCCGGCACGTTTTG                         | construction of plasmid pKF518-2                                        |
| KFO-0790 | GGAGTTCGATTAATGGGCACGGCCAACA                         | construction of plasmid pKF514-1                                        |
| KFO-0892 | GTTTTTTTTTAATACGACTCACTATAGGCATG<br>GCGATGGGCGAC     | amplification of RusT DNA template for T7 <i>in vitro</i> transcription |
| KFO-0893 | AGAAAAACGCCAGATGCGT                                  | amplification of RusT DNA template for T7 <i>in vitro</i> transcription |
| KFO-0898 | GGCCAGCGAGCTAACGAGAC                                 | nested arbitrary primer for mapping of MAR2xT7 insertion sites          |
| KFO-0899 | GGCCAGCGAGCTAACGAGACNNNNGTTGC                        | arbitrary primer for mapping of MAR2xT7 insertion sites                 |
| KFO-0901 | GGCCAGCGAGCTAACGAGACNNNNAGTAC                        | arbitrary primer for mapping of MAR2xT7 insertion sites                 |
| KFO-0922 | CTTTTGAATTTCGTGCCTCCAATAATCAGTC                      | construction of plasmid pKF544-1                                        |
| KFO-0923 | CTTTTGGTACCCTCTTGAGCCGAGGCGG                         | construction of plasmid pKF544-1                                        |
| KFO-0924 | CTTTTGAATTCAAAGCACAAAAGACTGCAGG                      | construction of plasmid pKF545-1                                        |
| KFO-0925 | CTTTTGGTACCGTTGGAAGCGGGCATATAG                       | construction of plasmid pKF545-1                                        |
| KFO-0926 | CTTTTGAATTCAATTCGCTGTTTCGATGAATTG                    | construction of plasmid pKF546-1                                        |
| KFO-0927 | CTTTTGGTACCGCCGGCGATCGTGCTC                          | construction of plasmid pKF546-1                                        |
| KFO-0928 | CTTTTGAATTCAAGAGAAGGCGGTTCCGCCG                      | construction of plasmid pKF547-1 and pKF548-1                           |
| KFO-0929 | CTTTTGGTACCGTCGACGTACTTCACGTCCT                      | construction of plasmid pKF547-1                                        |
| KFO-0930 | CTTTTGGTACCCAGGCCTCCTTACCTC                          | construction of plasmids pKF548-1                                       |
| KFO-0931 | CTTTTGAATTCAACTAAGAGAACAAAGTCATAC                    | construction of plasmid pKF549-1                                        |
| KFO-0932 | CTTTTGGTACCCATGTGCGAGCTCGGCTTG                       | construction of plasmid pKF549-1                                        |
| KFO-0933 | CTTTTGAATTCACCTGTTTTGGGGCCTTGT                       | construction of plasmid pKF550-3                                        |
| KFO-0934 | CTTTTGGTACCGAGGTCGGCCTGGGTCA                         | construction of plasmid pKF550-3                                        |
| KFO-0935 | CTTTTGAATTCCTCTGAACCACGCAGGCG                        | construction of plasmid pKF551-1                                        |
| KFO-0936 | CTTTTGGTACCCAGCCCGTACTCATGCTCG                       | construction of plasmid pKF551-1                                        |
| KFO-0937 | GTTTTTTTTAATACGACTCACTATAGGGAGGCA<br>AGGACGAAACGAGCC | amplification of CrfA DNA template for T7 <i>in vitro</i> transcription |
| KFO-0938 | ACACCAAACCCGCCGCGG                                   | amplification of CrfA DNA template for T7 <i>in vitro</i> transcription |
| KFO-0966 | CTTCTTTTCGGCGGACATAC                                 | primer extension <i>hfq-hflX</i> mRNA                                   |
| KFO-0983 | GAATTGGCGATAGACCATGAAGAAGCTC                         | construction of plasmid pKF563-1                                        |
| KFO-0984 | GTCTATCGCCAATTCCTGCGACGTCT                           | construction of plasmid pKF563-1                                        |

|          |                                                                       |                                                                                                    |
|----------|-----------------------------------------------------------------------|----------------------------------------------------------------------------------------------------|
| KFO-0989 | AATGAGGCGTTCCTTCAGATGAACATG                                           | construction of plasmid pKF566-1                                                                   |
| KFO-0990 | AAGGAACGCCTCATTCAACACGC                                               | construction of plasmid pKF566-1                                                                   |
| KFO-1298 | TCTCTGGTGGGCTCGTTTCGTCCTTGCAGT                                        | oligo probe for CrfA                                                                               |
| KFO-1575 | CATCTGGGCGCATGCCGCCGCCGGGAG                                           | construction of plasmid pKF732-3                                                                   |
| KFO-1576 | CGGCGGCATGCGCCAGATGCTCGACGC                                           | construction of plasmid pKF732-3                                                                   |
| KFO-1607 | GATATCTGGATCCACGAATTCGAGAGCTGCATGCCGATATAGG                           | construction of plasmid pKF754-15                                                                  |
| KFO-1610 | AGACGCGTCACGGCCGAAGTCGACATGCAGCCAGCCG                                 | construction of plasmid pKF754-15                                                                  |
| KFO-1611 | GATATCTGGATCCACGAATTCGTGTCGGCGCCGATGATGAAGA                           | construction of plasmid pKF747-1                                                                   |
| KFO-1614 | AGACGCGTCACGGCCGAAGACATTGACGATGCGGCCGAAC                              | construction of plasmid pKF747-1                                                                   |
| KFO-1641 | GCCGGGGGCCGACGCAATTCCTTCACGAC                                         | construction of plasmid pKF740-1                                                                   |
| KFO-1642 | AATTGCGTCCGCCCCCGGCGGACAGC                                            | construction of plasmid pKF740-1                                                                   |
| KFO-1654 | AAGCGTTCACCTCGGCCGCCATCAGCCTTACCC C                                   | construction of plasmid pKF754-15                                                                  |
| KFO-1655 | GGGGTAAGGCTGATGGCGGCCGAGTGAACGCTT                                     | construction of plasmid pKF754-15                                                                  |
| KFO-1656 | GCTGGAGACGAGCACCTCAACCCGGGAACGT AAGG                                  | construction of plasmid pKF747-1                                                                   |
| KFO-1657 | CGTTCGGGGTTGAGGTGCTCGTCTCCAGCGAAG                                     | construction of plasmid pKF747-1                                                                   |
| KFO-1684 | GATATCTGGATCCACGAATTCGCCGGAGCCAGTCAAGCGA                              | construction of plasmid pKF766-8                                                                   |
| KFO-1685 | CATCGAGCGCTGGGTTGCAGGGCGCCTTCA                                        | construction of plasmid pKF766-8                                                                   |
| KFO-1686 | CGCCCTGCAACCCAGCGCTCGATGCTCGGA                                        | construction of plasmid pKF766-8                                                                   |
| KFO-1687 | AGACGCGTCACGGCCGAAGAGCGCCGACCGTCTCCTGA                                | construction of plasmid pKF766-8                                                                   |
| KFO-1785 | GTTTTCATATGAGCCATATTCAACGGG                                           | construction of plasmid pKF776-1                                                                   |
| KFO-1786 | GTTTTGTCGACTTAGAAAACTCATCGAGCATC                                      | construction of plasmid pKF776-1                                                                   |
| KFO-2067 | TACAGTTTACGAACCGAACAGGC                                               | transposon-specific primer for mapping of MAR2xT7 insertion sites; PMFLGM.GB-3a primer (16)        |
| KFO-2069 | TGTCAACTGGGTTTCGTGCCTTCATCCG                                          | nested transposon-specific primer for mapping of MAR2xT7 insertion sites; PMFLGM.GB-2a primer (16) |
| KFO-2071 | GACCGAGATAGGGTTGAGTG                                                  | sequencing of PCR products for mapping of MAR2xT7 insertion sites; PMFLGM.GB-4a primer (16)        |
| KFO-2481 | GATATCTGGATCCACGAATTCGCCTTCTCGATT AACGTCGGC                           | construction of plasmid pKF889-5                                                                   |
| KFO-2482 | TTGTAGTCGATGTCGTGGTCCTTGTAGTCGCCGTCGTGGTCTTGTAGTCGAAGCGCGCGTGGATCGT   | construction of plasmid pKF889-5                                                                   |
| KFO-2483 | ACTACAAGGACCACGACATCGACTACAAGGACGACGACGACAAGTAGTAAGCGTCGGGATCCAA GACC | construction of plasmid pKF889-5                                                                   |
| KFO-2484 | AGACGCGTCACGGCCGAAGCCAGCCGTTGAACTTGAAGC                               | construction of plasmid pKF889-5                                                                   |
| KPO-1524 | CAACGGGAATCCTGCTCTG                                                   | construction of plasmid pKF755-3                                                                   |
| KPO-1528 | CAGAGCAGGATTCCCGTTGAGCACCGCCAGGTGCCG                                  | construction of plasmid pKF755-3                                                                   |
| M13fwd   | GTA AACGACGGCCAGT                                                     | sequencing of plasmids with backbone pBVMCS-6                                                      |

**Supplementary Table S5 – Plasmids**

| plasmid ID | Description                                                                                                                                                                                                                              | Backbone/marker | Reference                |
|------------|------------------------------------------------------------------------------------------------------------------------------------------------------------------------------------------------------------------------------------------|-----------------|--------------------------|
| pBVMCS-6   | empty vector                                                                                                                                                                                                                             | pBVMCS-6/CmR    | (3)                      |
| pGFPC-2    | empty vector                                                                                                                                                                                                                             | pGFPC-2/KanR    | (3)                      |
| pXGFP-5    | empty vector                                                                                                                                                                                                                             | pXGFP-5/TetR    | (3)                      |
| pNPTS138   | empty vector                                                                                                                                                                                                                             | pNPTS138/KanR   | M. R. Alley, unpublished |
| pMAR2xT7   | Himar1 transposon delivery vector                                                                                                                                                                                                        | pMAR2xT7/GentR  | (16)                     |
| pKF383-7   | expression of <i>chvR::lacZ</i> transcriptional fusion (-109 to +9 of <i>chvR</i> relative to TSS); integration into <i>xyI</i> locus                                                                                                    | pXGFP-5/TetR    | (1)                      |
| pKF385-2   | expression of <i>rsaA::gfp</i> translational fusion (up to +45 of <i>rsaA</i> relative to the translational start site) under control of the <i>rsaA</i> promoter; integration into <i>rsaA</i> locus                                    | pGFPC-2/KanR    | (1)                      |
| pKF482-1   | expression of <i>rusT</i> under control of the <i>van</i> promoter                                                                                                                                                                       | pBVMCS-6/KanR   | this study               |
| pKF493-2   | expression of <i>CCNA_02895::gfp</i> translational fusion (-269 to +60 of <i>CCNA_02895</i> relative to the translational start site) under control of the <i>rsaA</i> promoter, integration into <i>rsaA</i> locus                      | pGFPC-2/KanR    | this study               |
| pKF494-2   | expression of <i>CCNA_03263::gfp</i> translational fusion (-116 to +60 of <i>CCNA_03263</i> relative to the translational start site) under control of the <i>rsaA</i> promoter, integration into <i>rsaA</i> locus                      | pGFPC-2/KanR    | this study               |
| pKF495-1   | expression of <i>CCNA_01042::gfp</i> translational fusion (-225 of <i>CCNA_01043</i> to +60 of <i>CCNA_01042</i> relative to the translational start site) under control of the <i>rsaA</i> promoter, integration into <i>rsaA</i> locus | pGFPC-2/KanR    | this study               |
| pKF496-2   | expression of <i>CCNA_02400::gfp</i> translational fusion (-32 to +60 of <i>CCNA_02400</i> relative to the translational start site) under control of the <i>rsaA</i> promoter, integration into <i>rsaA</i> locus                       | pGFPC-2/KanR    | this study               |
| pKF497-2   | expression of <i>ompW::gfp</i> translational fusion (-40 to +75 of <i>ompW</i> relative to the translational start site) under control of the <i>rsaA</i> promoter, integration into <i>rsaA</i> locus                                   | pGFPC-2/KanR    | this study               |
| pKF498-1   | expression of <i>CCNA_01738::gfp</i> translational fusion (-86 to +60 of <i>CCNA_01738</i> relative to the translational start site) under control of the <i>rsaA</i> promoter, integration into <i>rsaA</i> locus                       | pGFPC-2/KanR    | this study               |
| pKF499-1   | expression of <i>CCNA_02380::gfp</i> translational fusion (-71 to +60 of <i>CCNA_02380</i> relative to the translational start site) under control of the <i>rsaA</i> promoter, integration into <i>rsaA</i> locus                       | pGFPC-2/KanR    | this study               |
| pKF500-2   | expression of <i>CCNA_03181::gfp</i> translational fusion (-156 to +60 of <i>CCNA_03181</i> relative to the translational start site) under control of the <i>rsaA</i> promoter, integration into <i>rsaA</i> locus                      | pGFPC-2/KanR    | this study               |
| pKF501-1   | expression of <i>CCNA_00210::gfp</i> translational fusion (-59 to +60 of <i>CCNA_00210</i> relative to the translational start site) under control of the <i>rsaA</i> promoter, integration into <i>rsaA</i> locus                       | pGFPC-2/KanR    | this study               |
| pKF502-1   | expression of <i>CCNA_01043::gfp</i> translational fusion (-43 to +60 of <i>CCNA_01043</i> relative to the translational start site) under control of the <i>rsaA</i> promoter, integration into <i>rsaA</i> locus                       | pGFPC-2/KanR    | this study               |
| pKF503-2   | expression of <i>CCNA_03248::gfp</i> translational fusion (-49 to +60 of <i>CCNA_03248</i> relative to the translational start site) under control of the <i>rsaA</i> promoter, integration into <i>rsaA</i> locus                       | pGFPC-2 /KanR   | this study               |

|          |                                                                                                                                                                                                                      |               |            |
|----------|----------------------------------------------------------------------------------------------------------------------------------------------------------------------------------------------------------------------|---------------|------------|
| pKF504-1 | expression of <i>CCNA_03294::gfp</i> translational fusion (-96 to +60 of <i>CCNA_03294</i> relative to the translational start site) under control of the <i>rsaA</i> promoter, integration into <i>rsaA</i> locus   | pGFPC-2/KanR  | this study |
| pKF505-1 | expression of <i>CCNA_01819::gfp</i> translational fusion (--179 to +60 of <i>CCNA_01819</i> relative to the translational start site) under control of the <i>rsaA</i> promoter, integration into <i>rsaA</i> locus | pGFPC-2/KanR  | this study |
| pKF506-1 | expression of <i>CCNA_01820::gfp</i> translational fusion (-53 to +60 of <i>CCNA_01819</i> relative to the translational start site) under control of the <i>rsaA</i> promoter, integration into <i>rsaA</i> locus   | pGFPC-2/KanR  | this study |
| pKF507-1 | expression of <i>rusT::lacZ</i> transcriptionalfusion (-x to +x of <i>rusT</i> relative to TSS); integration into <i>xyI</i> locus                                                                                   | pXGFP-5/TetR  | this study |
| pKF511-8 | allelic replacement of <i>rusT</i>                                                                                                                                                                                   | pNPTS138/KanR | this study |
| pKF518-2 | expression of <i>rusT-M1</i> (C53G) under control of the <i>van</i> promoter                                                                                                                                         | pBVMCS-6/CmR  | this study |
| pKF544-1 | expression of <i>CCNA_02741::gfp</i> translational fusion (-99 to +75 of <i>CCNA_02741</i> relative to the translational start site) under control of the <i>rsaA</i> promoter, integration into <i>rsaA</i> locus   | pGFPC-2/KanR  | this study |
| pKF545-1 | expression of <i>CCNA_03774::gfp</i> translational fusion (-29 to +60 of <i>CCNA_03774</i> relative to the translational start site) under control of the <i>rsaA</i> promoter, integration into <i>rsaA</i> locus   | pGFPC-2/KanR  | this study |
| pKF546-1 | expression of <i>CCNA_00338::gfp</i> translational fusion (-94 to +60 of <i>CCNA_00338</i> relative to the translational start site) under control of the <i>rsaA</i> promoter, integration into <i>rsaA</i> locus   | pGFPC-2/KanR  | this study |
| pKF547-1 | expression of <i>glnBA::gfp</i> translational fusion (-424 to +60 of <i>glnB</i> relative to the translational start site) under control of the <i>rsaA</i> promoter, integration into <i>rsaA</i> locus             | pGFPC-2/KanR  | this study |
| pKF548-1 | expression of <i>glnB::gfp</i> translational fusion (-42 to +60 of <i>glnB</i> relative to the translational start site) under control of the <i>rsaA</i> promoter, integration into <i>rsaA</i> locus               | pGFPC-2/KanR  | this study |
| pKF549-1 | expression of <i>CCNA_02342::gfp</i> translational fusion (-35 to +60 of <i>CCNA_02342</i> relative to the translational start site) under control of the <i>rsaA</i> promoter, integration into <i>rsaA</i> locus   | pGFPC-2/KanR  | this study |
| pKF550-3 | expression of <i>CCNA_02379::gfp</i> translational fusion (-71 to +60 of <i>CCNA_02379</i> relative to the translational start site) under control of the <i>rsaA</i> promoter, integration into <i>rsaA</i> locus   | pGFPC-2/KanR  | this study |
| pKF551-1 | expression of <i>CCNA_03360::gfp</i> translational fusion (-282 to +60 of <i>CCNA_03360</i> relative to the translational start site) under control of the <i>rsaA</i> promoter, integration into <i>rsaA</i> locus  | pGFPC-2/KanR  | this study |
| pKF563-1 | expression of <i>ompW::gfp</i> translational fusion (SNE in <i>ompW</i> relative to the TSS) under control of the <i>rsaA</i> promoter, integration into <i>rsaA</i> locus                                           | pGFPC-2/KanR  | this study |
| pKF566-1 | expression of <i>CCNA_00210::gfp</i> translational fusion (SNE in <i>CCNA_00210</i> relative to the TSS) under control of the <i>rsaA</i> promoter, integration into <i>rsaA</i> locus                               | pGFPC-2/KanR  | this study |
| pKF732-3 | expression of <i>rusT-SL3mut</i> under control of the <i>van</i> promoter                                                                                                                                            | pBVMCS-6/CmR  |            |
| pKF740-1 | expression of <i>CCNA_02895::gfp</i> translational fusion (SNE in <i>CCNA_02895</i> relative to the TSS) under control of the <i>rsaA</i> promoter, integration into <i>rsaA</i> locus                               | pGFPC-2/KanR  | this study |
| pKF776-1 | expression of <i>rusT::nptII</i> transcriptionalfusion (-x to +x of <i>rusT</i> relative to TSS); integration into <i>xyI</i> locus                                                                                  | pXGFP-5/TetR  | this study |
| pKF889-5 | insertion of C-terminal 3xFLAG in <i>CCNA_00210</i>                                                                                                                                                                  | pNPTS138/KanR | this study |

**Supplementary Table S6 – Bacterial strains**

| strain                     | stock name | bacterium                   | genotype/relevant markers                             | source/reference |
|----------------------------|------------|-----------------------------|-------------------------------------------------------|------------------|
| wild type                  | KFS-0006   | <i>C. crescentus</i> NA1000 |                                                       | Laboratory stock |
| $\Delta vanAB$             | KFS-0058   | <i>C. crescentus</i> NA1000 | $\Delta vanAB$                                        | (1)              |
|                            | KFS-0096   | <i>C. crescentus</i> NA1000 | $\Delta vanAB$ + pBVMCS-6                             | this study       |
| <i>3xFLAG::hfq</i>         | KFS-0344   | <i>C. crescentus</i> NA1000 | <i>3XFLAG::hfq</i>                                    | (1)              |
| $\Delta hfq$               | KFS-0570   | <i>C. crescentus</i> NA1000 | $\Delta hfq::TetR$                                    | (17)             |
|                            | KFS-0830   | <i>C. crescentus</i> NA1000 | $\Delta vanAB$ + pKF482-1                             | this study       |
| $\Delta vanAB \Delta rusT$ | KFS-0849   | <i>C. crescentus</i> NA1000 | $\Delta vanAB \Delta rusT$                            | this study       |
|                            | KFS-1200   | <i>C. crescentus</i> NA1000 | $\Delta vanAB \Delta rusT PrsaA::pKF493-2$ + pBVMCS-6 | this study       |
|                            | KFS-1201   | <i>C. crescentus</i> NA1000 | $\Delta vanAB \Delta rusT PrsaA::pKF493-2$ + pKF482-1 | this study       |
|                            | KFS-1202   | <i>C. crescentus</i> NA1000 | $\Delta vanAB \Delta rusT PrsaA::pKF494-2$ + pBVMCS-6 | this study       |
|                            | KFS-1203   | <i>C. crescentus</i> NA1000 | $\Delta vanAB \Delta rusT PrsaA::pKF494-2$ + pKF482-1 | this study       |
|                            | KFS-1204   | <i>C. crescentus</i> NA1000 | $\Delta vanAB \Delta rusT PrsaA::pKF495-1$ + pBVMCS-6 | this study       |
|                            | KFS-1205   | <i>C. crescentus</i> NA1000 | $\Delta vanAB \Delta rusT PrsaA::pKF495-1$ + pKF482-1 | this study       |
|                            | KFS-1206   | <i>C. crescentus</i> NA1000 | $\Delta vanAB \Delta rusT PrsaA::pKF496-2$ + pBVMCS-6 | this study       |
|                            | KFS-1207   | <i>C. crescentus</i> NA1000 | $\Delta vanAB \Delta rusT PrsaA::pKF496-2$ + pKF482-1 | this study       |
|                            | KFS-1209   | <i>C. crescentus</i> NA1000 | $\Delta vanAB \Delta rusT PrsaA::pKF497-2$ + pBVMCS-6 | this study       |
|                            | KFS-1210   | <i>C. crescentus</i> NA1000 | $\Delta vanAB \Delta rusT PrsaA::pKF497-2$ + pKF482-1 | this study       |
|                            | KFS-1211   | <i>C. crescentus</i> NA1000 | $\Delta vanAB \Delta rusT PrsaA::pKF497-2$ + pKF518-2 | this study       |
|                            | KFS-1212   | <i>C. crescentus</i> NA1000 | $\Delta vanAB \Delta rusT PrsaA::pKF498-1$ + pBVMCS-6 | this study       |
|                            | KFS-1213   | <i>C. crescentus</i> NA1000 | $\Delta vanAB \Delta rusT PrsaA::pKF498-1$ + pKF482-1 | this study       |
|                            | KFS-1214   | <i>C. crescentus</i> NA1000 | $\Delta vanAB \Delta rusT PrsaA::pKF501-1$ + pBVMCS-6 | this study       |
|                            | KFS-1215   | <i>C. crescentus</i> NA1000 | $\Delta vanAB \Delta rusT PrsaA::pKF501-1$ + pKF482-1 | this study       |



|  |          |                             |                                                       |            |
|--|----------|-----------------------------|-------------------------------------------------------|------------|
|  | KFS-1216 | <i>C. crescentus</i> NA1000 | $\Delta vanAB \Delta rusT$ PrsaA::pKF501-1 + pKF518-2 | this study |
|  | KFS-1217 | <i>C. crescentus</i> NA1000 | $\Delta vanAB \Delta rusT$ PrsaA::pKF502-1 + pBVMCS-6 | this study |
|  | KFS-1218 | <i>C. crescentus</i> NA1000 | $\Delta vanAB \Delta rusT$ PrsaA::pKF502-1 + pKF482-1 | this study |
|  | KFS-1219 | <i>C. crescentus</i> NA1000 | $\Delta vanAB \Delta rusT$ PrsaA::pKF503-2 + pBVMCS-6 | this study |
|  | KFS-1220 | <i>C. crescentus</i> NA1000 | $\Delta vanAB \Delta rusT$ PrsaA::pKF503-2 + pKF482-1 | this study |
|  | KFS-1221 | <i>C. crescentus</i> NA1000 | $\Delta vanAB \Delta rusT$ PrsaA::pKF504-1 + pBVMCS-6 | this study |
|  | KFS-1222 | <i>C. crescentus</i> NA1000 | $\Delta vanAB \Delta rusT$ PrsaA::pKF504-1 + pKF482-1 | this study |
|  | KFS-1224 | <i>C. crescentus</i> NA1000 | $\Delta vanAB \Delta rusT$ PrsaA::pKF505-1 + pBVMCS-6 | this study |
|  | KFS-1225 | <i>C. crescentus</i> NA1000 | $\Delta vanAB \Delta rusT$ PrsaA::pKF505-1 + pKF482-1 | this study |
|  | KFS-1227 | <i>C. crescentus</i> NA1000 | $\Delta vanAB \Delta rusT$ PrsaA::pKF506-1 + pBVMCS-6 | this study |
|  | KFS-1228 | <i>C. crescentus</i> NA1000 | $\Delta vanAB \Delta rusT$ PrsaA::pKF506-1 + pKF482-1 | this study |
|  | KFS-1229 | <i>C. crescentus</i> NA1000 | $\Delta vanAB \Delta rusT$ PrsaA::pKF544-1 + pBVMCS-6 | this study |
|  | KFS-1230 | <i>C. crescentus</i> NA1000 | $\Delta vanAB \Delta rusT$ PrsaA::pKF544-1 + pKF482-1 | this study |
|  | KFS-1231 | <i>C. crescentus</i> NA1000 | $\Delta vanAB \Delta rusT$ PrsaA::pKF545-1 + pBVMCS-6 | this study |
|  | KFS-1232 | <i>C. crescentus</i> NA1000 | $\Delta vanAB \Delta rusT$ PrsaA::pKF545-1 + pKF482-1 | this study |
|  | KFS-1234 | <i>C. crescentus</i> NA1000 | $\Delta vanAB \Delta rusT$ PrsaA::pKF546-1 + pBVMCS-6 | this study |
|  | KFS-1235 | <i>C. crescentus</i> NA1000 | $\Delta vanAB \Delta rusT$ PrsaA::pKF546-1 + pKF482-1 | this study |
|  | KFS-1236 | <i>C. crescentus</i> NA1000 | $\Delta vanAB \Delta rusT$ PrsaA::pKF547-1 + pBVMCS-6 | this study |
|  | KFS-1237 | <i>C. crescentus</i> NA1000 | $\Delta vanAB \Delta rusT$ PrsaA::pKF547-1 + pKF482-1 | this study |
|  | KFS-1238 | <i>C. crescentus</i> NA1000 | $\Delta vanAB \Delta rusT$ PrsaA::pKF548-1 + pBVMCS-6 | this study |
|  | KFS-1239 | <i>C. crescentus</i> NA1000 | $\Delta vanAB \Delta rusT$ PrsaA::pKF548-1 + pKF482-1 | this study |
|  | KFS-1240 | <i>C. crescentus</i> NA1000 | $\Delta vanAB \Delta rusT$ PrsaA::pKF549-1 + pBVMCS-6 | this study |
|  | KFS-1241 | <i>C. crescentus</i> NA1000 | $\Delta vanAB \Delta rusT$ PrsaA::pKF549-1 + pKF482-1 | this study |
|  | KFS-1242 | <i>C. crescentus</i> NA1000 | $\Delta vanAB \Delta rusT$ PrsaA::pKF550-3 + pBVMCS-6 | this study |
|  | KFS-1243 | <i>C. crescentus</i> NA1000 | $\Delta vanAB \Delta rusT$ PrsaA::pKF550-3 + pKF482-1 | this study |

|  |          |                             |                                                                         |            |
|--|----------|-----------------------------|-------------------------------------------------------------------------|------------|
|  | KFS-1244 | <i>C. crescentus</i> NA1000 | $\Delta vanAB \Delta rusT PrsaA::pKF551-1 + pBVMCS-6$                   | this study |
|  | KFS-1245 | <i>C. crescentus</i> NA1000 | $\Delta vanAB \Delta rusT PrsaA::pKF551-1 + pKF482-1$                   | this study |
|  | KFS-1246 | <i>C. crescentus</i> NA1000 | $\Delta vanAB \Delta rusT PrsaA::pKF563-1 + pBVMCS-6$                   | this study |
|  | KFS-1247 | <i>C. crescentus</i> NA1000 | $\Delta vanAB \Delta rusT PrsaA::pKF563-1 + pKF482-1$                   | this study |
|  | KFS-1248 | <i>C. crescentus</i> NA1000 | $\Delta vanAB \Delta rusT PrsaA::pKF563-1 + pKF518-2$                   | this study |
|  | KFS-1255 | <i>C. crescentus</i> NA1000 | $\Delta vanAB \Delta rusT PrsaA::pKF566-1 + pBVMCS-6$                   | this study |
|  | KFS-1256 | <i>C. crescentus</i> NA1000 | $\Delta vanAB \Delta rusT PrsaA::pKF566-1 + pKF482-1$                   | this study |
|  | KFS-1257 | <i>C. crescentus</i> NA1000 | $\Delta vanAB \Delta rusT PrsaA::pKF566-1 + pKF518-2$                   | this study |
|  | KFS-1261 | <i>C. crescentus</i> NA1000 | $\Delta vanAB \Delta rusT PrsaA::pKF358-2 + pBVMCS-6$                   | this study |
|  | KFS-1262 | <i>C. crescentus</i> NA1000 | $\Delta vanAB \Delta rusT PrsaA::pKF358-2 + pKF482-1$                   | this study |
|  | KFS-1263 | <i>C. crescentus</i> NA1000 | $\Delta vanAB \Delta rusT PrsaA::pKF358-2 + pKF518-2$                   | this study |
|  | KFS-1283 | <i>C. crescentus</i> NA1000 | $\Delta vanAB \Delta rusT PrsaA::pKF499-1 + pBVMCS-6$                   | this study |
|  | KFS-1284 | <i>C. crescentus</i> NA1000 | $\Delta vanAB \Delta rusT PrsaA::pKF499-1 + pKF482-1$                   | this study |
|  | KFS-1285 | <i>C. crescentus</i> NA1000 | $\Delta vanAB \Delta rusT PrsaA::pKF500-2 + pBVMCS-6$                   | this study |
|  | KFS-1286 | <i>C. crescentus</i> NA1000 | $\Delta vanAB \Delta rusT PrsaA::pKF500-2 + pKF482-1$                   | this study |
|  | KFS-1287 | <i>C. crescentus</i> NA1000 | $\Delta vanAB \Delta rusT + pBVMCS-6$                                   | this study |
|  | KFS-1288 | <i>C. crescentus</i> NA1000 | $\Delta vanAB \Delta rusT + pKF482-1$                                   | this study |
|  | KFS-1289 | <i>C. crescentus</i> NA1000 | $\Delta vanAB \Delta rusT + pKF518-2$                                   | this study |
|  | KFS-1290 | <i>C. crescentus</i> NA1000 | $\Delta vanAB \Delta rusT \Delta hfq::TetR + pBVMCS-6$                  | this study |
|  | KFS-1291 | <i>C. crescentus</i> NA1000 | $\Delta vanAB \Delta rusT \Delta hfq::TetR + pKF482-1$                  | this study |
|  | KFS-1292 | <i>C. crescentus</i> NA1000 | $\Delta vanAB \Delta rusT \Delta hfq::TetR PrsaA::pKF385-2 + pBVMCS-6$  | this study |
|  | KFS-1293 | <i>C. crescentus</i> NA1000 | $\Delta vanAB \Delta rusT \Delta hfq::TetR PrsaA::pKF385-2 + pKF482-1$  | this study |
|  | KFS-1294 | <i>C. crescentus</i> NA1000 | $\Delta vanAB \Delta rusT \Delta hfq::TetR PrsaA:: pKF493-2 + pBVMCS-6$ | this study |
|  | KFS-1295 | <i>C. crescentus</i> NA1000 | $\Delta vanAB \Delta rusT \Delta hfq::TetR PrsaA:: pKF493-2 + pKF482-1$ | this study |
|  | KFS-1296 | <i>C. crescentus</i> NA1000 | $\Delta vanAB \Delta rusT \Delta hfq::TetR PrsaA:: pKF494-2 + pBVMCS-6$ | this study |

|                                               |          |                             |                                                                                                                                                                                                                                                                              |            |
|-----------------------------------------------|----------|-----------------------------|------------------------------------------------------------------------------------------------------------------------------------------------------------------------------------------------------------------------------------------------------------------------------|------------|
|                                               | KFS-1297 | <i>C. crescentus</i> NA1000 | $\Delta vanAB \Delta rusT \Delta hfq::TetR$ PrsaA:: pKF494-2 + pKF482-1                                                                                                                                                                                                      | this study |
|                                               | KFS-1298 | <i>C. crescentus</i> NA1000 | $\Delta vanAB \Delta rusT \Delta hfq::TetR$ PrsaA:: pKF495-1 + pBVMCS-6                                                                                                                                                                                                      | this study |
|                                               | KFS-1299 | <i>C. crescentus</i> NA1000 | $\Delta vanAB \Delta rusT \Delta hfq::TetR$ PrsaA:: pKF495-1 + pKF482-1                                                                                                                                                                                                      | this study |
|                                               | KFS-1300 | <i>C. crescentus</i> NA1000 | $\Delta vanAB \Delta rusT \Delta hfq::TetR$ PrsaA:: pKF501-1 + pBVMCS-6                                                                                                                                                                                                      | this study |
|                                               | KFS-1301 | <i>C. crescentus</i> NA1000 | $\Delta vanAB \Delta rusT \Delta hfq::TetR$ PrsaA:: pKF501-1 + pKF482-1                                                                                                                                                                                                      | this study |
|                                               | KFS-1302 | <i>C. crescentus</i> NA1000 | $\Delta vanAB \Delta rusT \Delta hfq::TetR$ PrsaA:: pKF503-2 + pBVMCS-6                                                                                                                                                                                                      | this study |
|                                               | KFS-1303 | <i>C. crescentus</i> NA1000 | $\Delta vanAB \Delta rusT \Delta hfq::TetR$ PrsaA:: pKF503-2 + pKF482-1                                                                                                                                                                                                      | this study |
| $\Delta vanAB \Delta rusT \Delta hfq$         | KFS-1648 | <i>C. crescentus</i> NA1000 | $\Delta vanAB \Delta rusT \Delta hfq::TetR$                                                                                                                                                                                                                                  | this study |
|                                               | KFS-1678 | <i>C. crescentus</i> NA1000 | $\Delta vanAB \Delta rusT$ PrsaA::pKF566-1 + pBVMCS-6                                                                                                                                                                                                                        | this study |
|                                               | KFS-1679 | <i>C. crescentus</i> NA1000 | $\Delta vanAB \Delta rusT$ PrsaA::pKF566-1 + pKF482-1                                                                                                                                                                                                                        | this study |
|                                               | KFS-1680 | <i>C. crescentus</i> NA1000 | $\Delta vanAB \Delta rusT$ PrsaA::pKF566-1 + pKF518-2                                                                                                                                                                                                                        | this study |
|                                               | KFS-1681 | <i>C. crescentus</i> NA1000 | $\Delta vanAB \Delta rusT$ PrsaA::pKF740-1 + pBVMCS-6                                                                                                                                                                                                                        | this study |
|                                               | KFS-1682 | <i>C. crescentus</i> NA1000 | $\Delta vanAB \Delta rusT$ PrsaA::pKF740-1 + pKF482-1                                                                                                                                                                                                                        | this study |
|                                               | KFS-1683 | <i>C. crescentus</i> NA1000 | $\Delta vanAB \Delta rusT$ PrsaA::pKF740-1 + pKF518-2                                                                                                                                                                                                                        | this study |
| $\Delta vanAB$ CCNA_00210::3xFLAG             | KFS-2117 | <i>C. crescentus</i> NA1000 | $\Delta vanAB$ CCNA_00210::3xFLAG                                                                                                                                                                                                                                            | this study |
|                                               | KFS-2134 | <i>C. crescentus</i> NA1000 | $\Delta vanAB$ CCNA_00210::3xFLAG + pBVMCS-6                                                                                                                                                                                                                                 | this study |
|                                               | KFS-2135 | <i>C. crescentus</i> NA1000 | $\Delta vanAB$ CCNA_00210::3xFLAG + pKF482-1                                                                                                                                                                                                                                 | this study |
| $\Delta vanAB \Delta rusT$ CCNA_00210::3xFLAG | KFS-2173 | <i>C. crescentus</i> NA1000 | $\Delta vanAB \Delta rusT$ CCNA_00210::3xFLAG                                                                                                                                                                                                                                | this study |
|                                               | KFS-2219 | <i>C. crescentus</i> NA1000 | $\Delta vanAB \Delta rusT$ CCNA_00210::3xFLAG + pBVMCS-6                                                                                                                                                                                                                     | this study |
|                                               | KFS-2220 | <i>C. crescentus</i> NA1000 | $\Delta vanAB \Delta rusT$ CCNA_00210::3xFLAG + pKF482-1                                                                                                                                                                                                                     | this study |
| <i>ntrX</i> -HA                               | FC3561   | <i>C. crescentus</i> CB15   | <i>ntrX</i> :: <i>ntrX</i> -HA                                                                                                                                                                                                                                               | (18)       |
| <i>E. coli</i> TOP10                          | KFS-0088 | <i>E. coli</i>              | <i>F</i> - <i>mcrA</i> $\Delta$ ( <i>mrr</i> - <i>hsdRMS</i> - <i>mcrBC</i> ) $\Phi$ 80 <i>lacZ</i> $\Delta$ M15 $\Delta$ <i>lacX74</i> <i>recA1</i> <i>araD139</i> $\Delta$ ( <i>ara-leu</i> )7697 <i>galU</i> <i>galK</i> <i>rpsL</i> <i>endA1</i> <i>nupG</i> $\lambda$ - | invitrogen |
| <i>E. coli</i> WM3064                         |          | <i>E. coli</i>              | <i>thrB1004</i> <i>pro</i> <i>thi</i> <i>rpsL</i> <i>hsdS</i> <i>lacZ</i> $\Delta$ M15 RP4-1360 $\Delta$ ( <i>araBAD</i> )567 $\Delta$ <i>dapA</i> 1341::[ <i>erm</i> <i>pir</i> (wt)]                                                                                       | (6)        |

## SUPPORTING REFERENCES

1. Fröhlich KS, Förstner KU, & Gitai Z (2018) Post-transcriptional gene regulation by an Hfq-independent small RNA in *Caulobacter crescentus*. *Nucleic Acids Res* 46(20):10969-10982.
2. Larsen RA, Wilson MM, Guss AM, & Metcalf WW (2002) Genetic analysis of pigment biosynthesis in *Xanthobacter autotrophicus* Py2 using a new, highly efficient transposon mutagenesis system that is functional in a wide variety of bacteria. *Arch Microbiol* 178(3):193-201.
3. Thanbichler M, Iniesta AA, & Shapiro L (2007) A comprehensive set of plasmids for vanillate- and xylose-inducible gene expression in *Caulobacter crescentus*. *Nucleic Acids Res* 35(20):e137.
4. Skerker JM, Prasol MS, Perchuk BS, Biondi EG, & Laub MT (2005) Two-component signal transduction pathways regulating growth and cell cycle progression in a bacterium: a system-level analysis. *PLoS Biol* 3(10):e334.
5. Ely B (1991) Genetics of *Caulobacter crescentus*. *Methods Enzymol* 204:372-384.
6. Saltikov CW & Newman DK (2003) Genetic identification of a respiratory arsenate reductase. *Proc Natl Acad Sci U S A* 100(19):10983-10988.
7. Chao Y, Papenfort K, Reinhardt R, Sharma CM, & Vogel J (2012) An atlas of Hfq-bound transcripts reveals 3' UTRs as a genomic reservoir of regulatory small RNAs. *EMBO J* 31(20):4005-4019.
8. Edgar R, Domrachev M, & Lash AE (2002) Gene Expression Omnibus: NCBI gene expression and hybridization array data repository. *Nucleic Acids Res* 30(1):207-210.
9. Huber M, Fröhlich KS, Radmer J, & Papenfort K (2020) Switching fatty acid metabolism by an RNA-controlled feed forward loop. *Proc Natl Acad Sci U S A* 117(14):8044-8054.
10. Papenfort K, *et al.* (2006)  $\sigma^E$ -dependent small RNAs of *Salmonella* respond to membrane stress by accelerating global *omp* mRNA decay. *Mol Microbiol* 62(6):1674-1688.
11. Fröhlich KS, Haneke K, Papenfort K, & Vogel J (2016) The target spectrum of SdsR small RNA in *Salmonella*. *Nucleic Acids Res* 44(21):10406-10422.
12. Fröhlich KS, Papenfort K, Fekete A, & Vogel J (2013) A small RNA activates CFA synthase by isoform-specific mRNA stabilization. *EMBO J* 32(22):2963-2979.
13. Corpet F (1988) Multiple sequence alignment with hierarchical clustering. *Nucleic Acids Res* 16(22):10881-10890.
14. Rehmsmeier M, Steffen P, Hochsmann M, & Giegerich R (2004) Fast and effective prediction of microRNA/target duplexes. *RNA* 10(10):1507-1517.
15. Mann M, Wright PR, & Backofen R (2017) IntaRNA 2.0: enhanced and customizable prediction of RNA-RNA interactions. *Nucleic Acids Res* 45(W1):W435-W439.
16. Liberati NT, *et al.* (2006) An ordered, nonredundant library of *Pseudomonas aeruginosa* strain PA14 transposon insertion mutants. *Proc Natl Acad Sci U S A* 103(8):2833-2838.
17. Irnov I, *et al.* (2017) Crosstalk between the tricarboxylic acid cycle and peptidoglycan synthesis in *Caulobacter crescentus* through the homeostatic control of alpha-ketoglutarate. *PLoS Genet* 13(8):e1006978.
18. Stein BJ, Fiebig A, & Crosson S (2021) The ChvG-ChvI and NtrY-NtrX Two-Component Systems Coordinately Regulate Growth of *Caulobacter crescentus*. *J Bacteriol* 203(17):e0019921.
